# Supplementary material for: Parvalbumin-positive interneurons mediate neocortical-hippocampal interactions that are necessary for memory consolidation
Source: eLife journal article supplement (doi:10.7554/elife.27868), 2017-09-29
Supplement: supp [file elife-27868-supp-v1.zip]

Archive with 10 entries (10 files):
- elife_poa_e27868_Figure_3_figure_supplement_2.pdf
- elife_poa_e27868_Figure_3_figure_supplement_1.pdf
- elife_poa_e27868_Figure_1_figure_supplement_3.pdf
- elife_poa_e27868_Figure_1_figure_supplement_1.pdf
- elife_poa_e27868_Figure_4_figure_supplement_1.pdf
- elife_poa_e27868_Transparent_Reporting_File.pdf
- elife_poa_e27868_Figure_1_figure_supplement_2.pdf
- elife_poa_e27868_Figure_4_figure_supplement_2.pdf
- elife_poa_e27868_Figure_5_figure_supplement_1.pdf
- elife_poa_e27868_Figure_2_figure_supplement_1.pdf
