# Supplementary figures and images for: Parvalbumin-positive interneurons mediate neocortical-hippocampal interactions that are necessary for memory consolidation
Source: eLife journal article supplement (doi:10.7554/elife.27868), 2017-09-29

**Figure 3 - figure supplement 2**

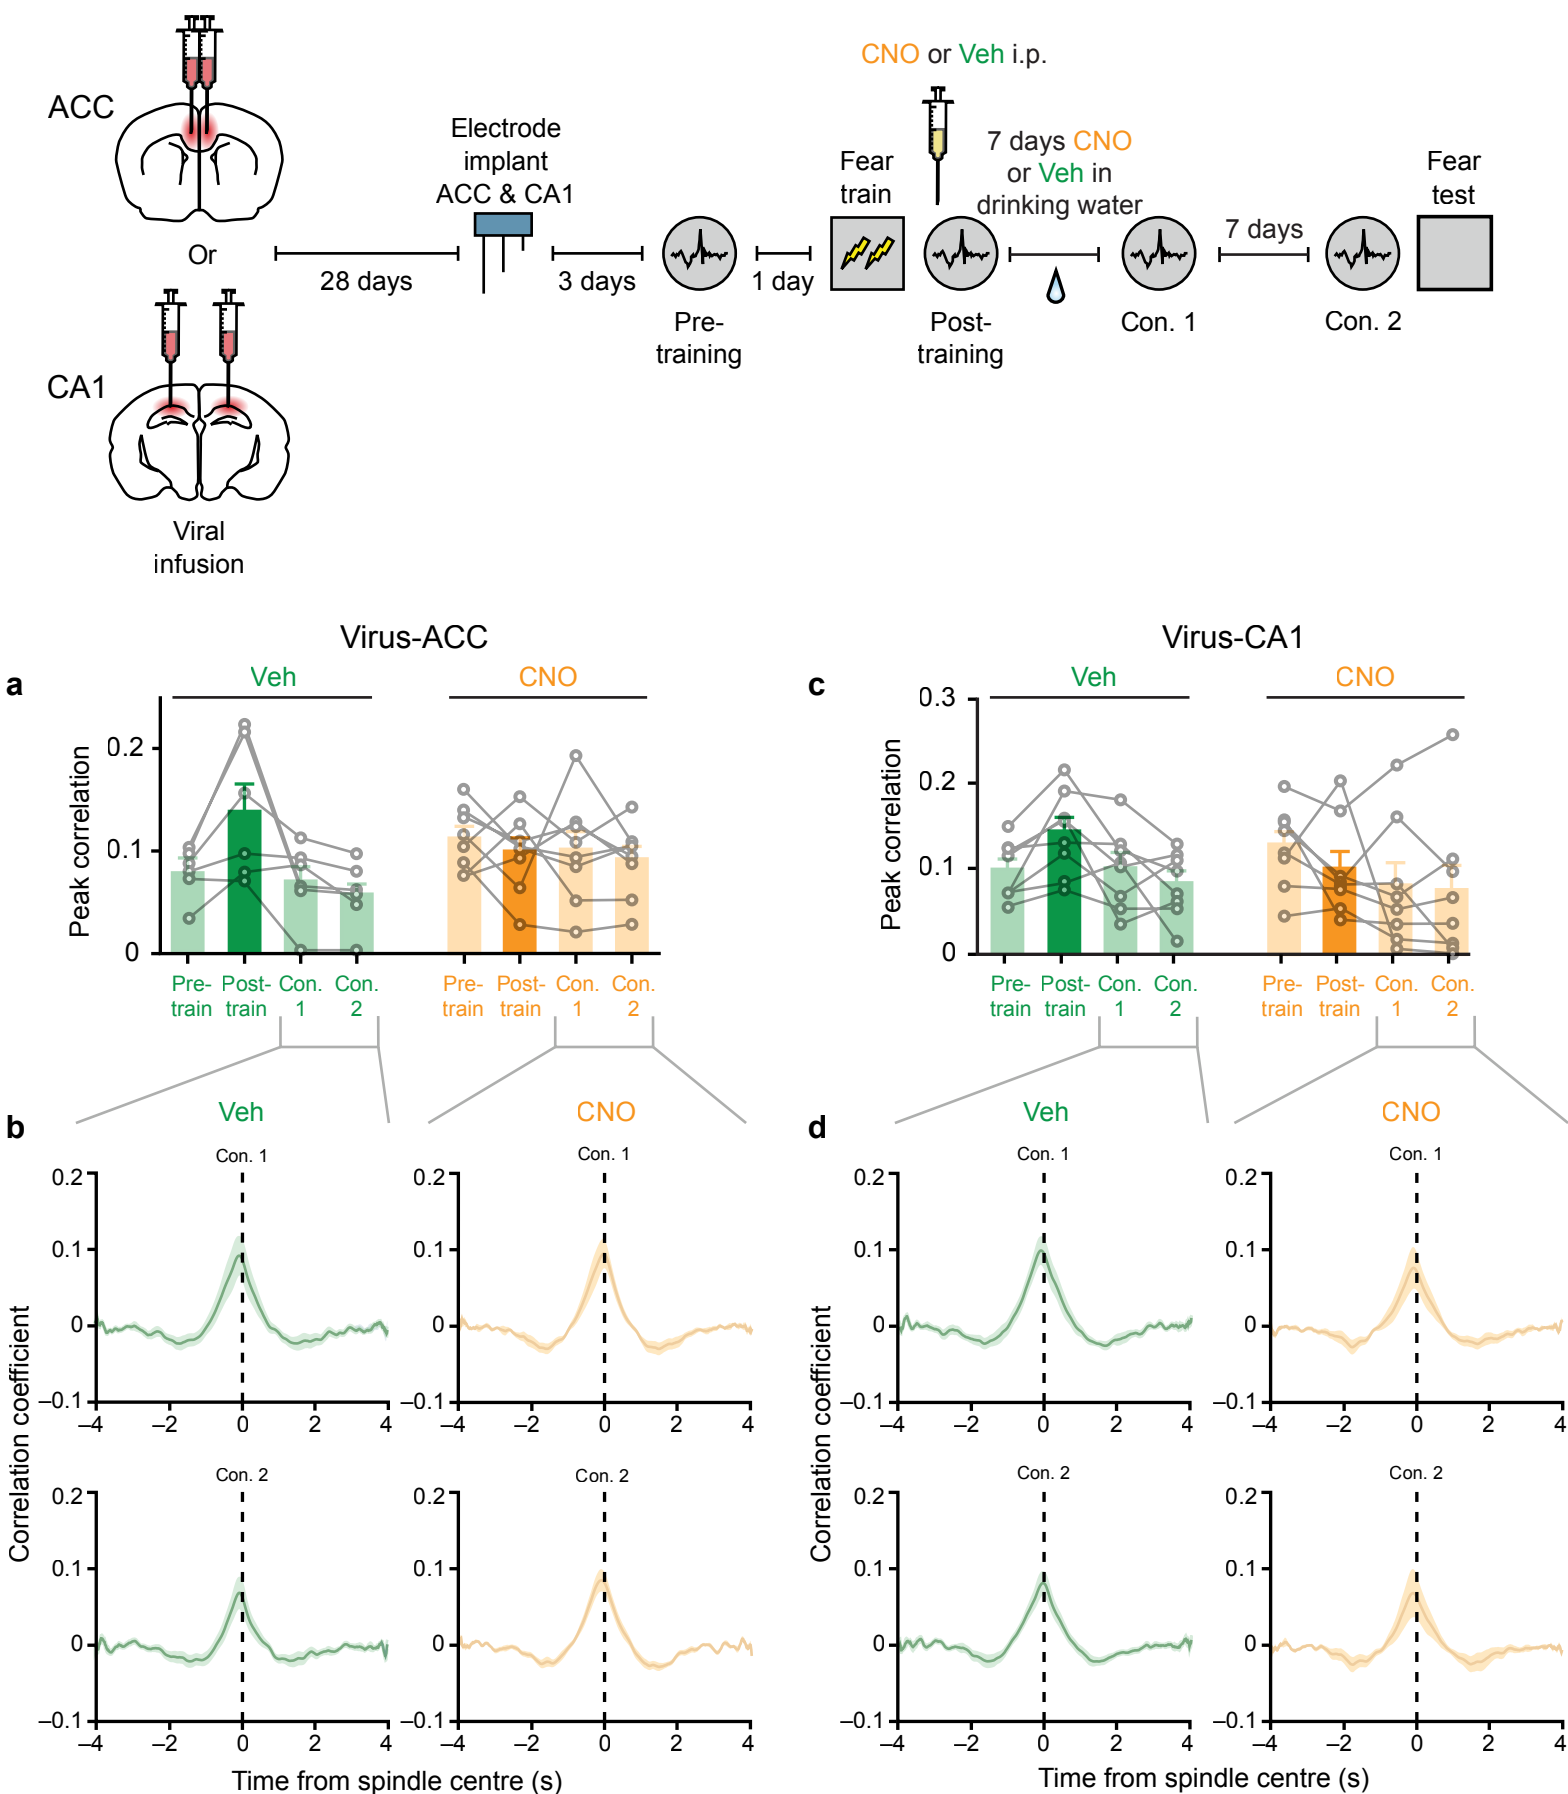

Supplement: supp [file elife-27868-supp-v1.zip › elife_poa_e27868_Figure_3_figure_supplement_2.pdf]

**Figure 3 - figure supplement 1**

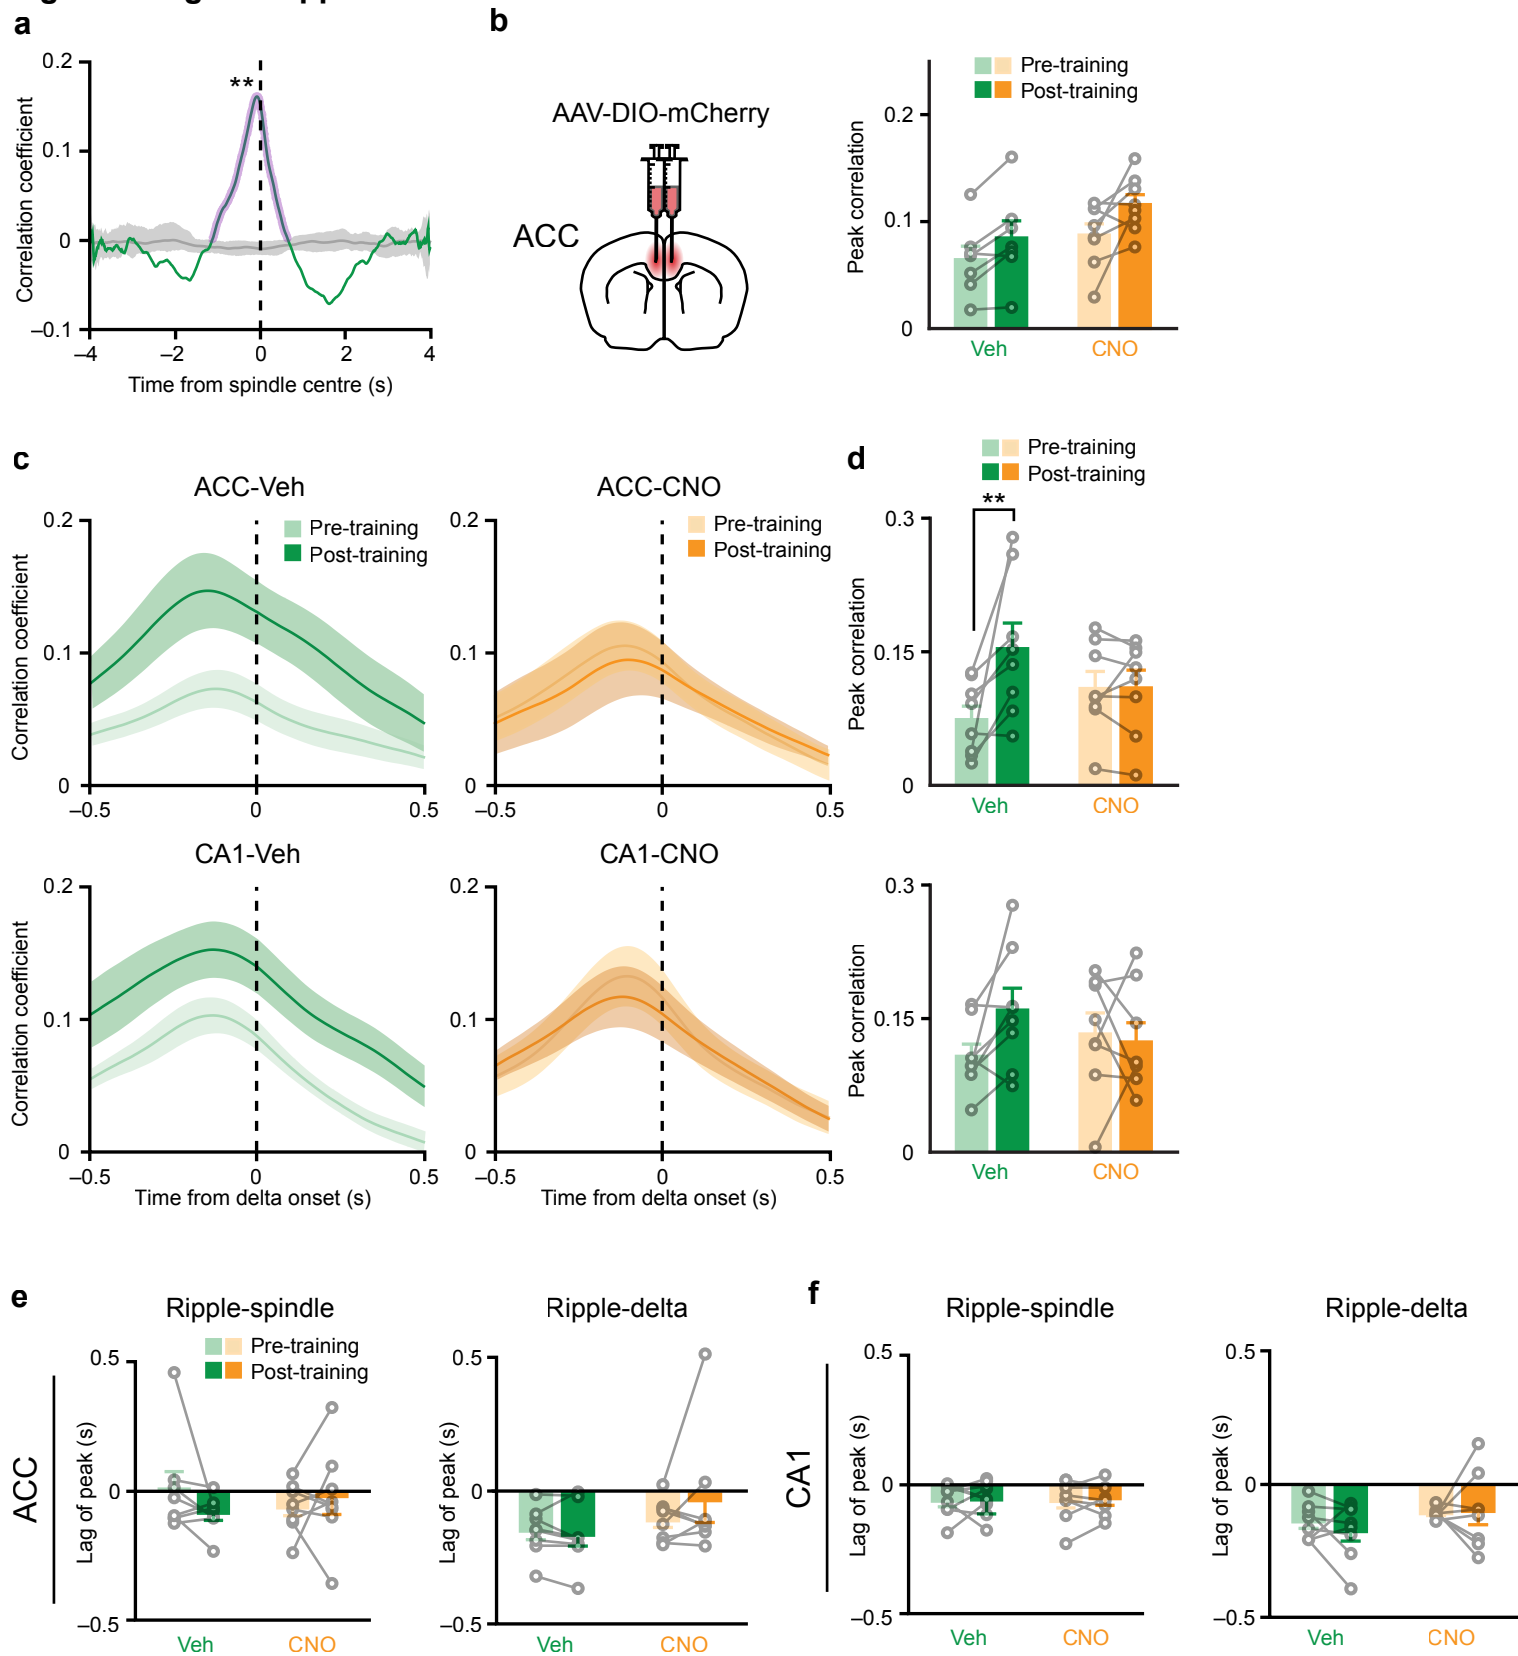

Supplement: supp [file elife-27868-supp-v1.zip › elife_poa_e27868_Figure_3_figure_supplement_1.pdf]

**Figure 1 - figure supplement 3**

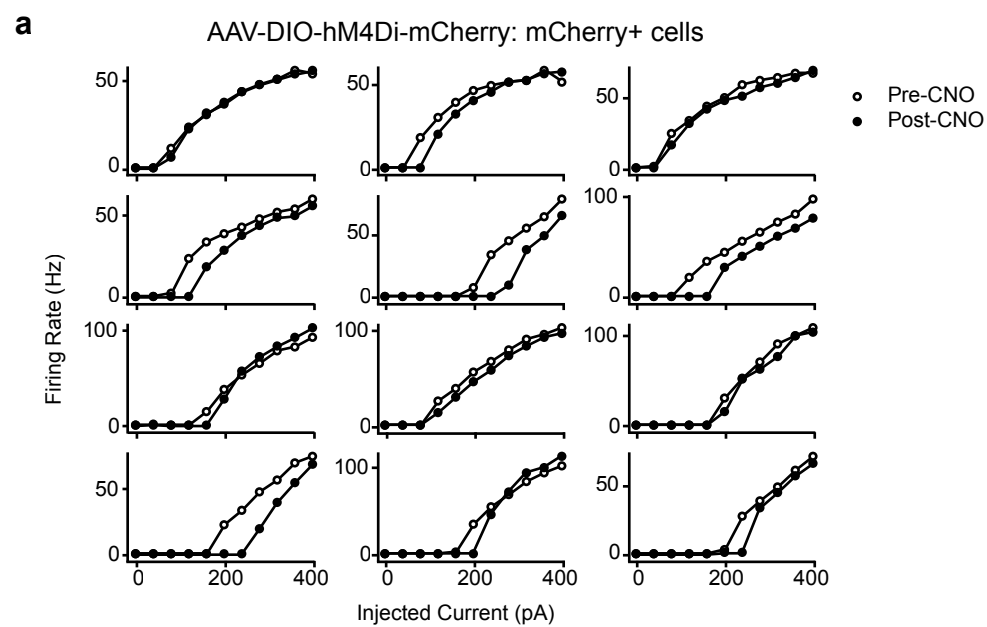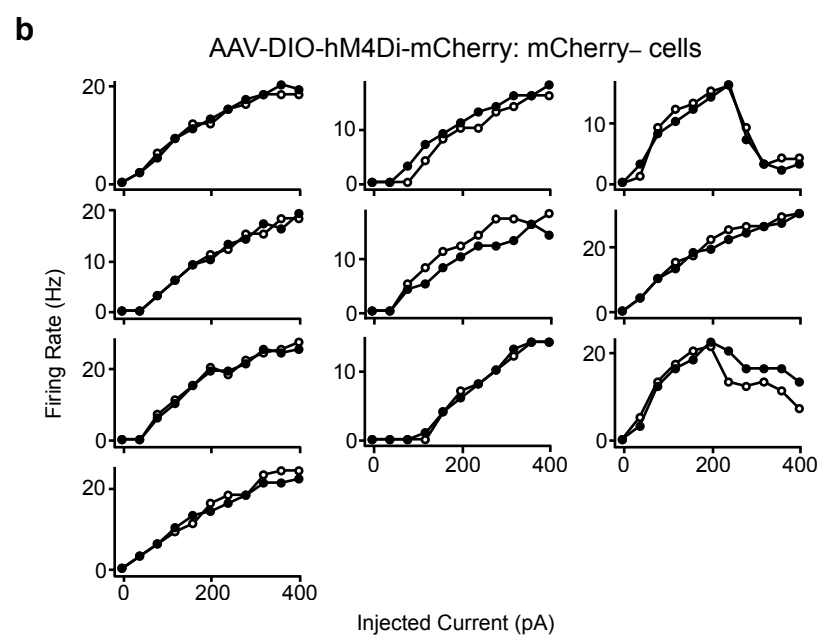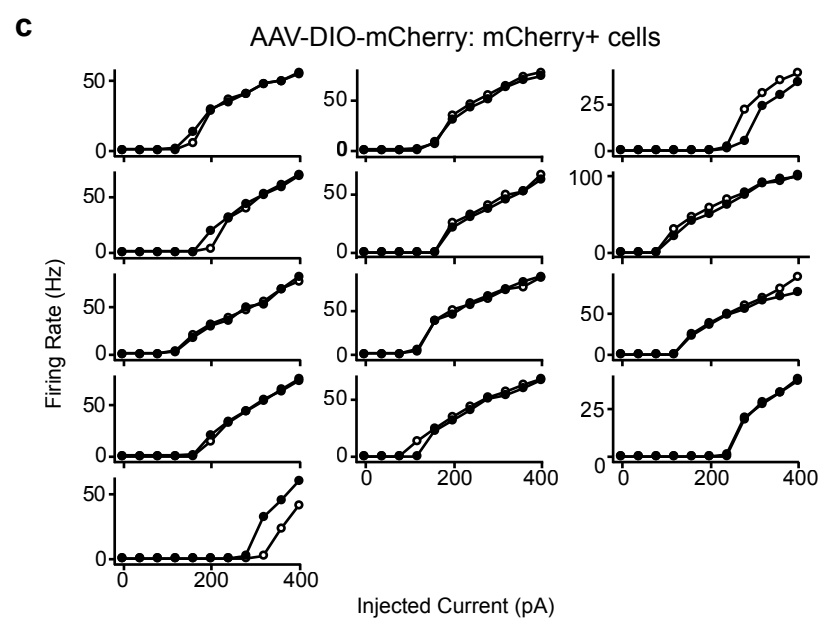

Supplement: supp [file elife-27868-supp-v1.zip › elife_poa_e27868_Figure_1_figure_supplement_3.pdf]

Figure 1 - figure supplement 1

a

ACC

hM4Di-mCherry

DAPI

CA1

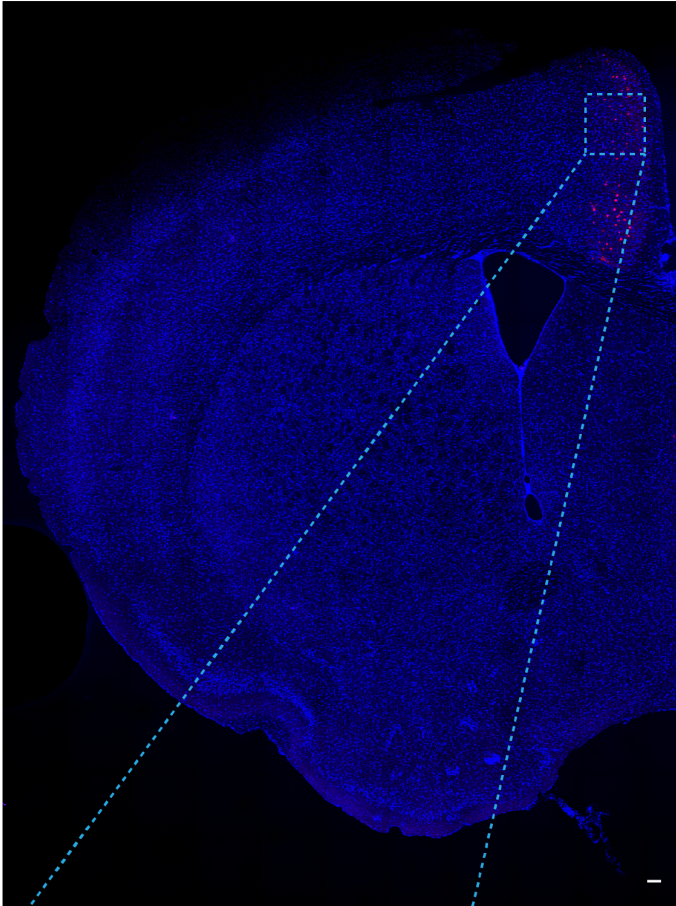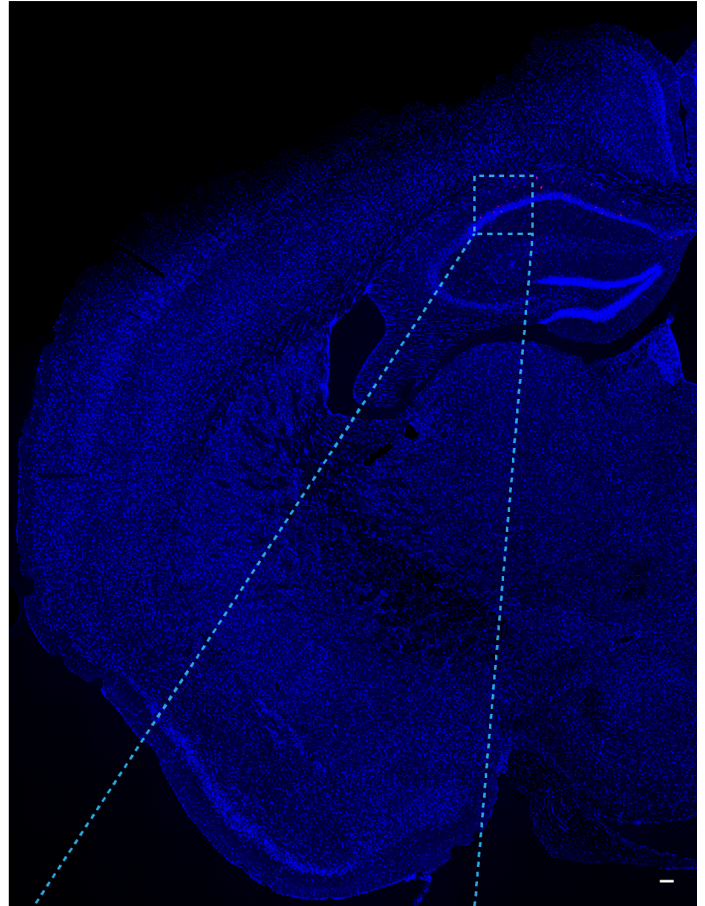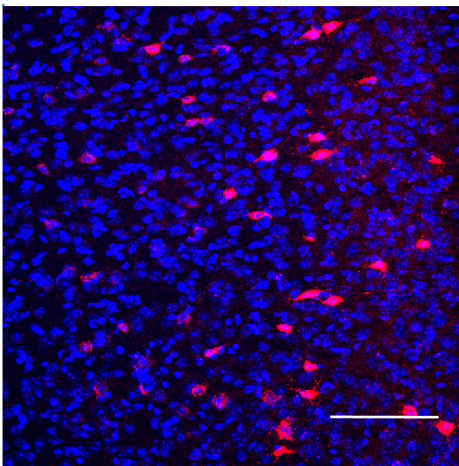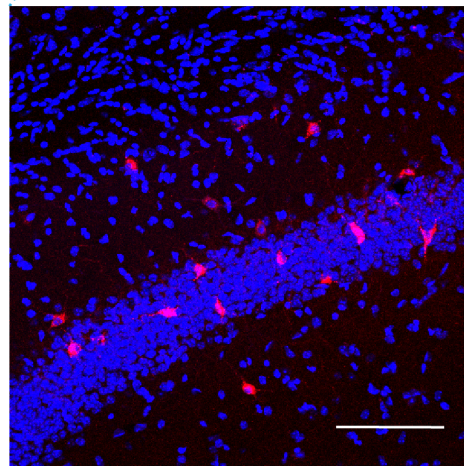

b

ACC

Cresyl violet

CA1

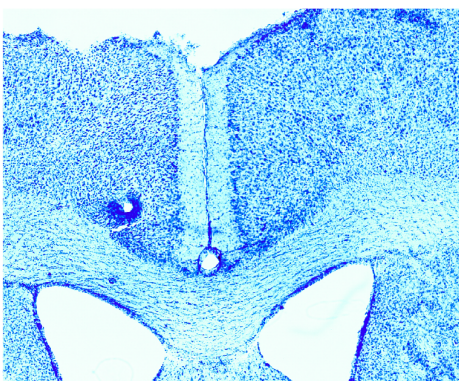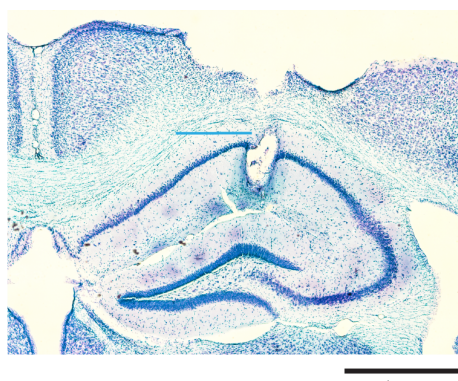

Supplement: supp [file elife-27868-supp-v1.zip › elife_poa_e27868_Figure_1_figure_supplement_1.pdf]

Figure 4 - figure supplement 1

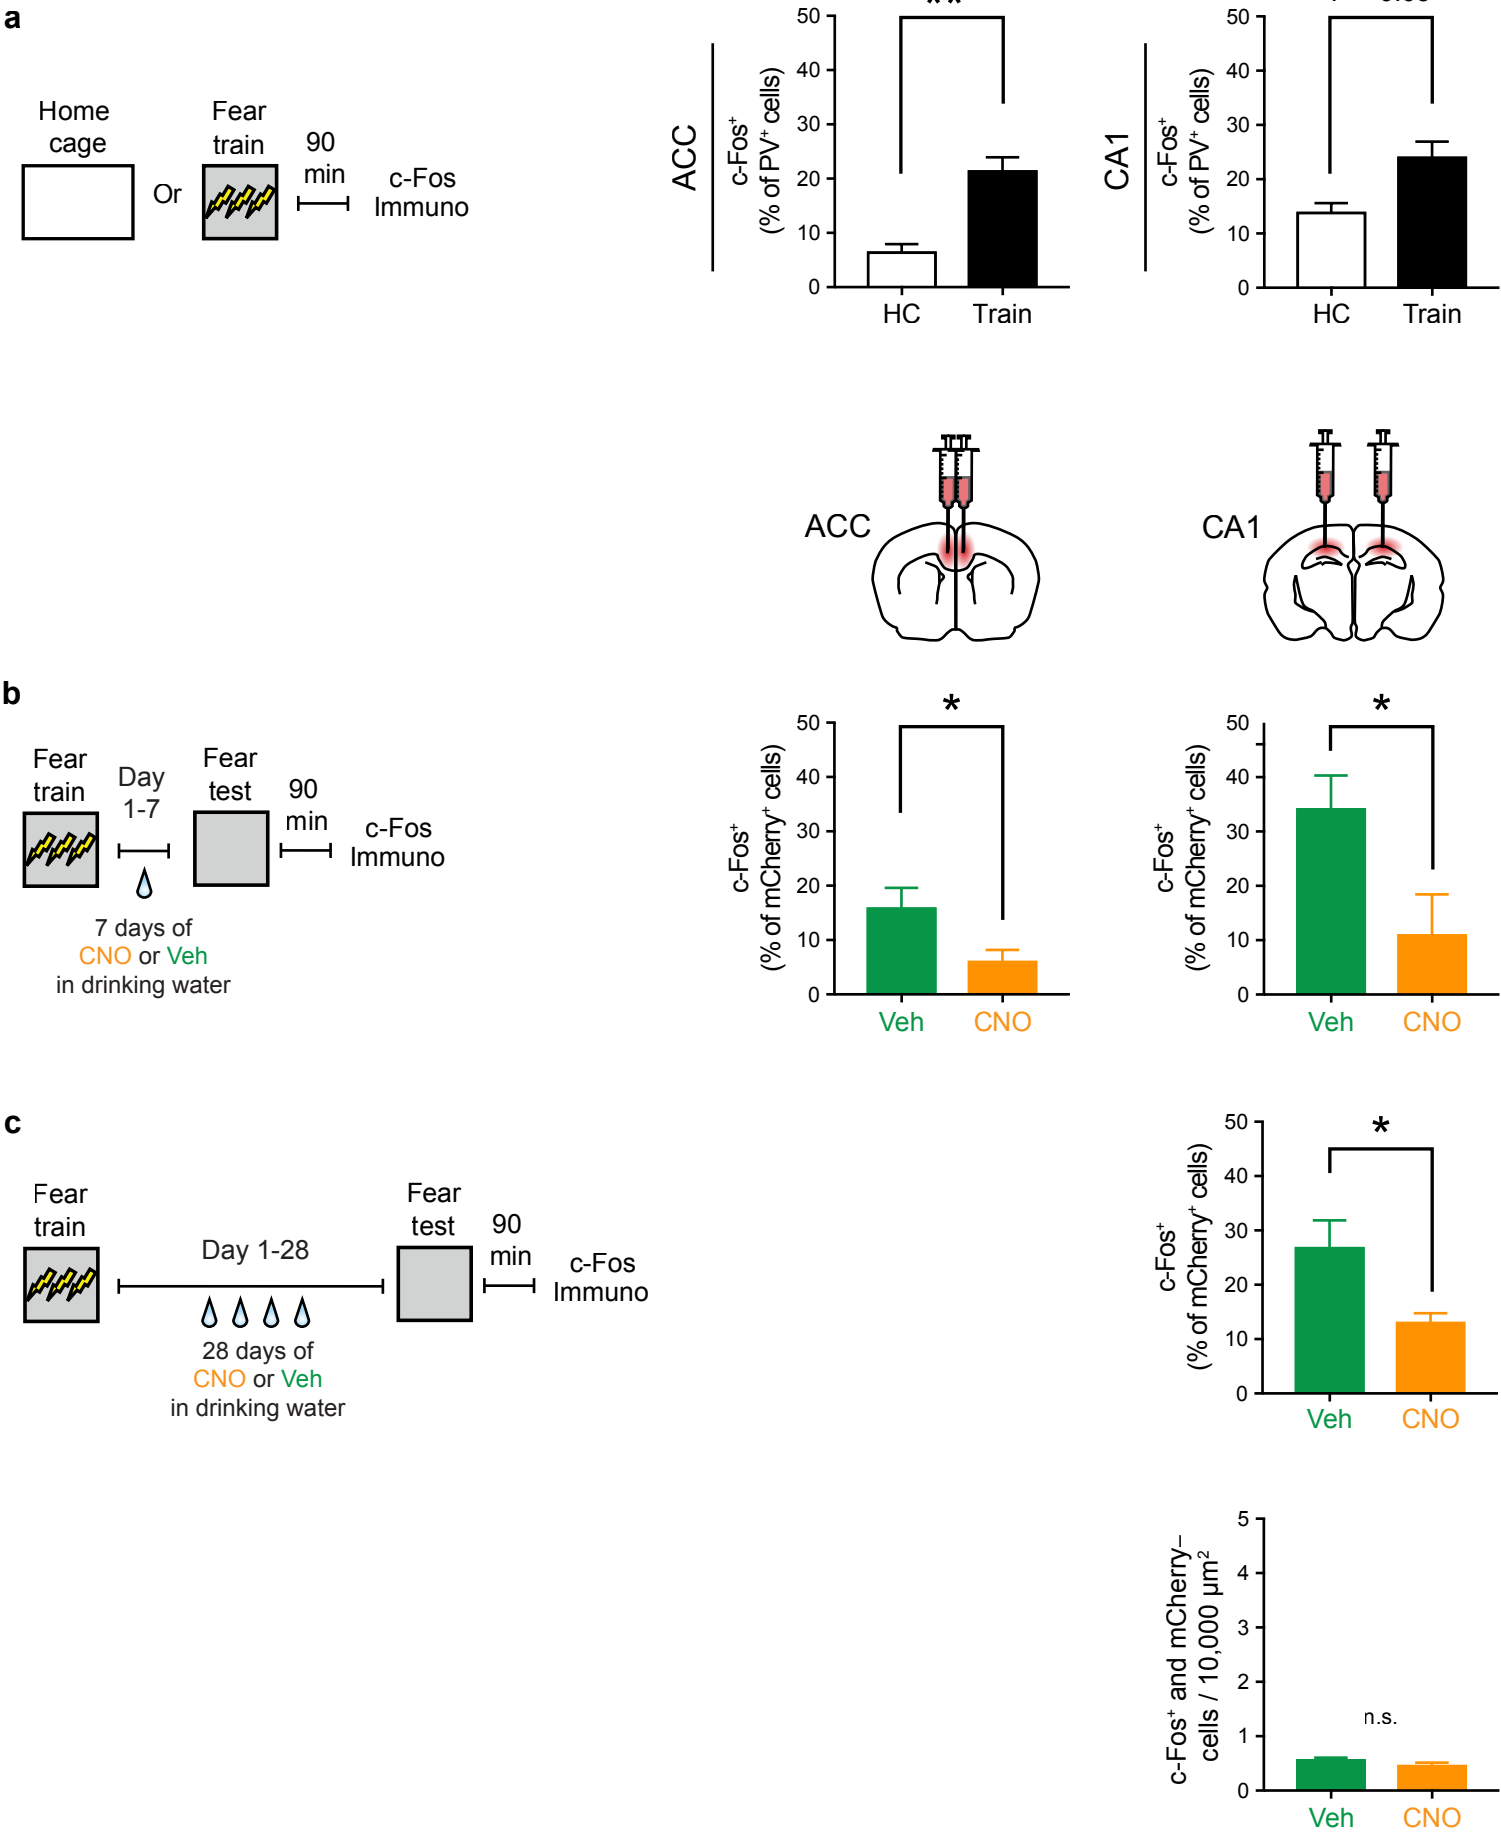

Supplement: supp [file elife-27868-supp-v1.zip › elife_poa_e27868_Figure_4_figure_supplement_1.pdf]

Figure 1 - figure supplement 2

a

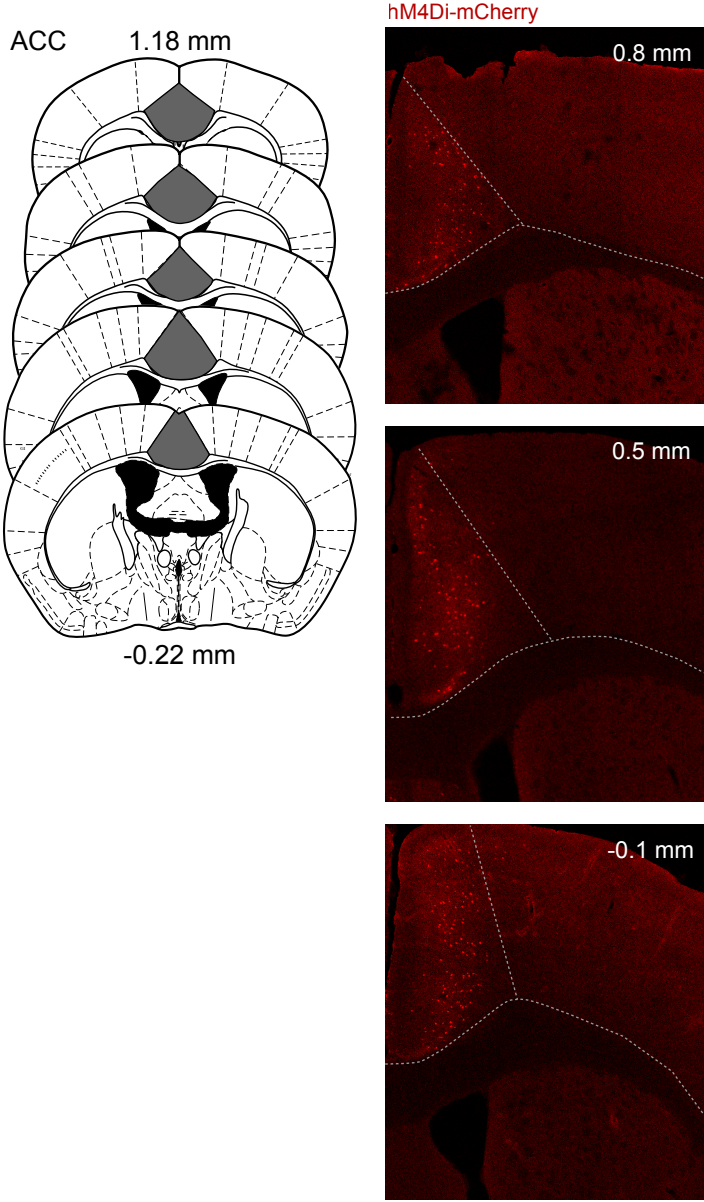

b

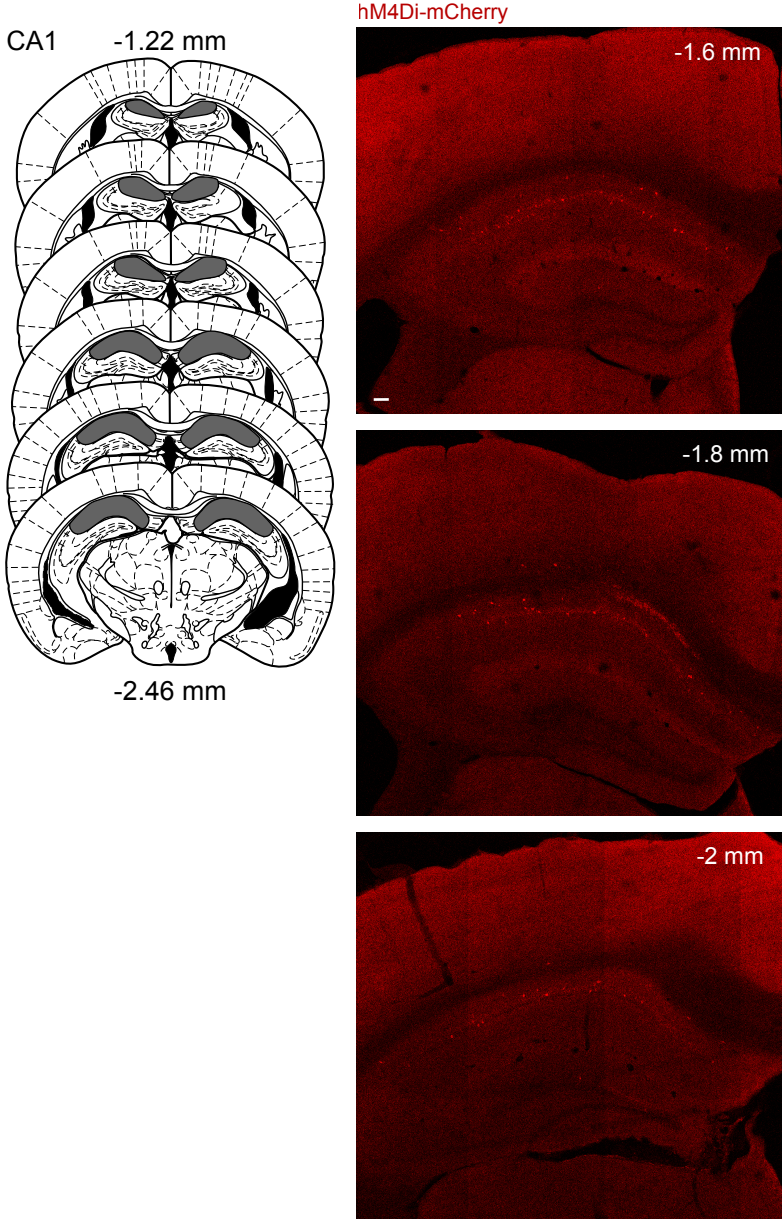

Supplement: supp [file elife-27868-supp-v1.zip › elife_poa_e27868_Figure_1_figure_supplement_2.pdf]

**Figure 4 - figure supplement 2**

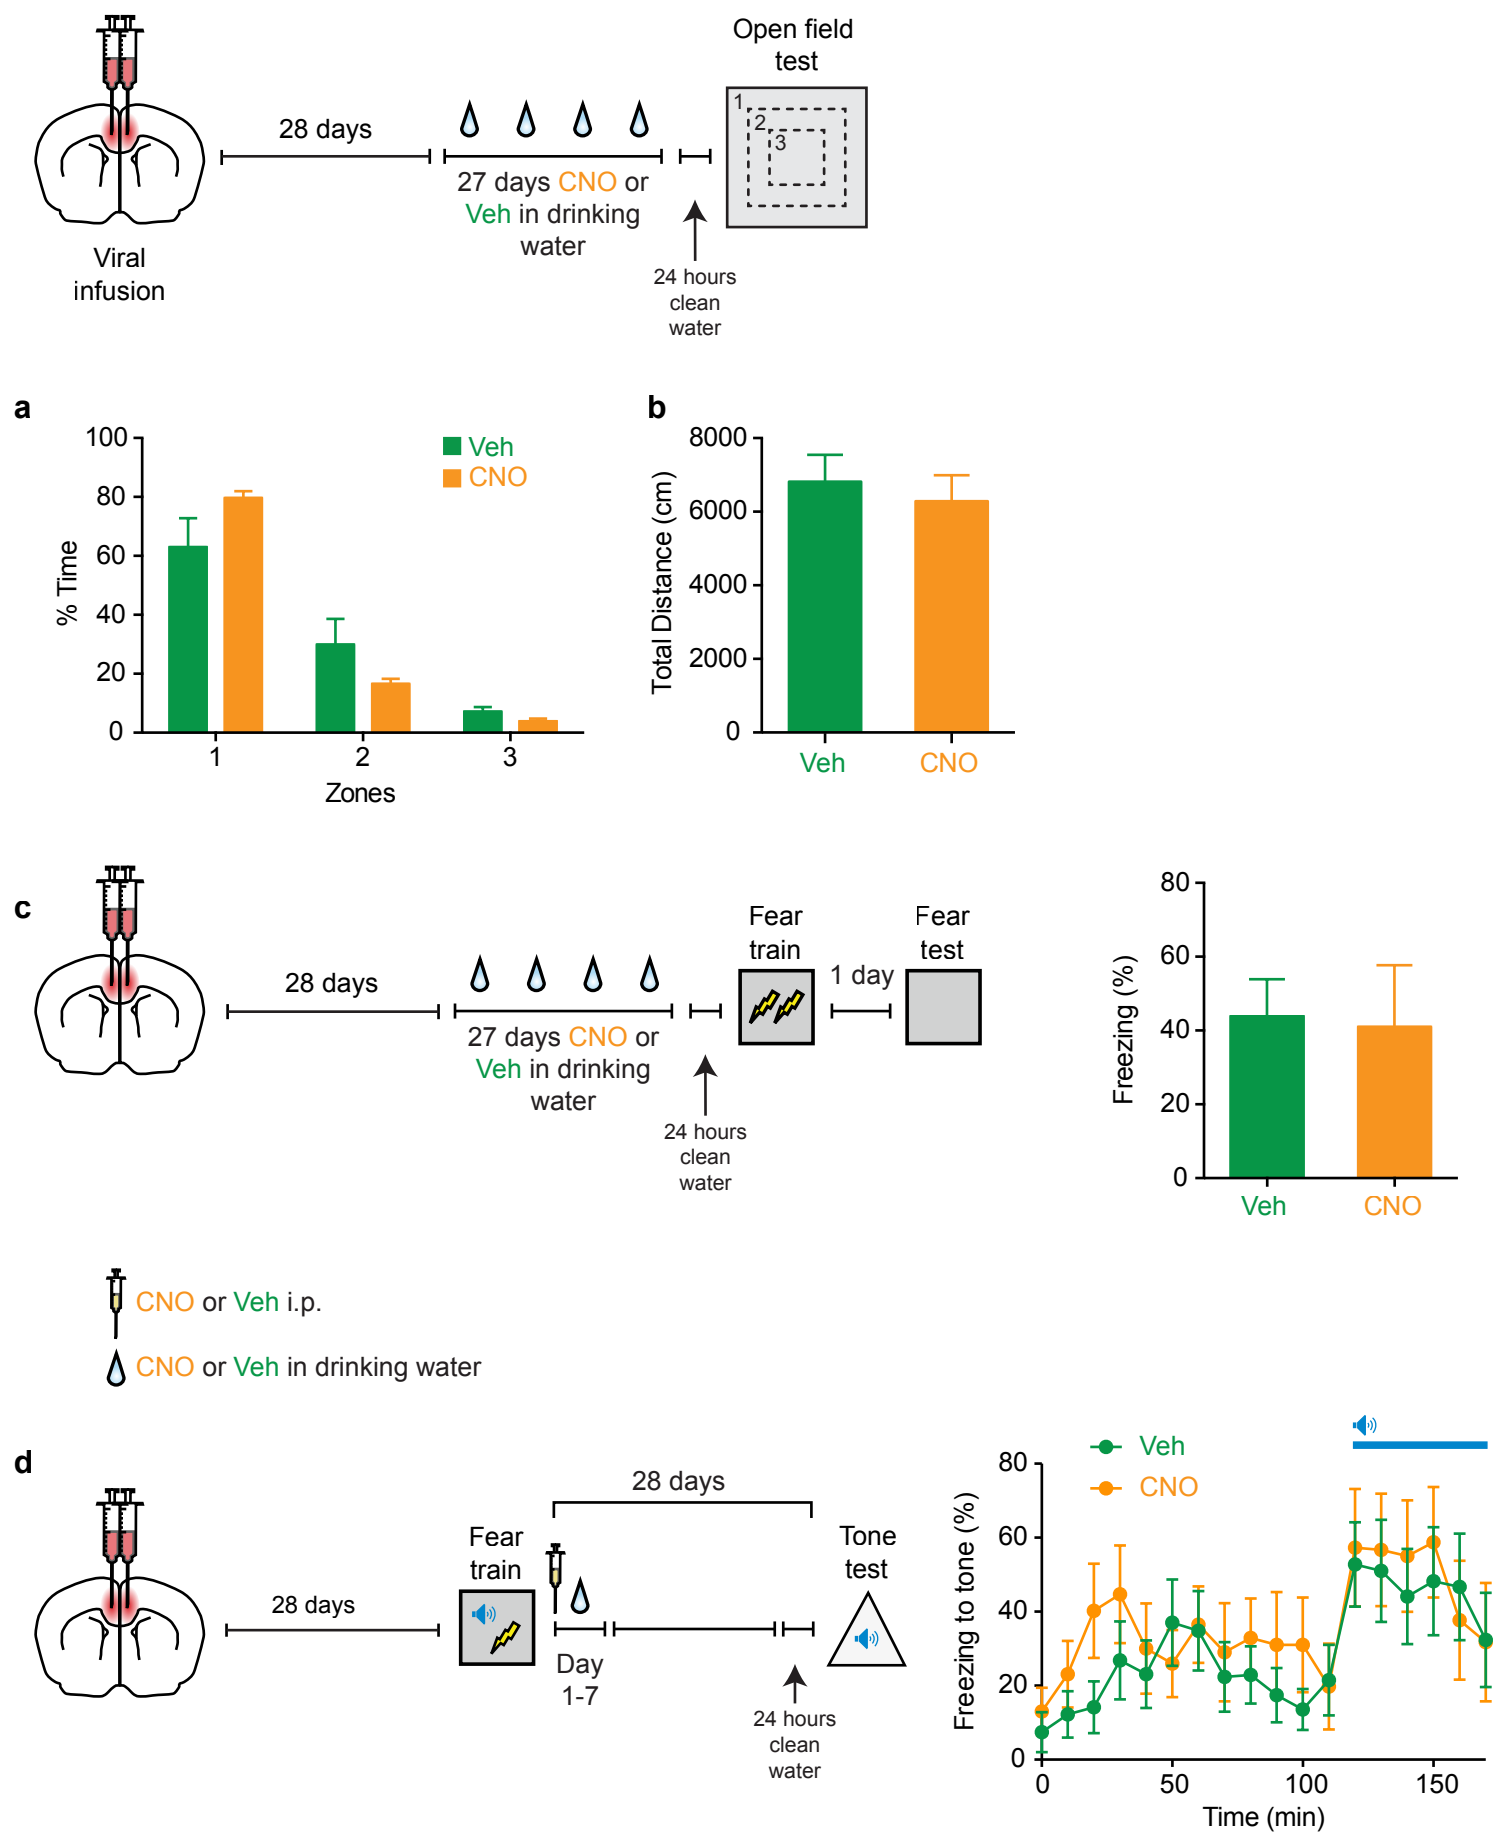

Supplement: supp [file elife-27868-supp-v1.zip › elife_poa_e27868_Figure_4_figure_supplement_2.pdf]

**Figure 5 - figure supplement 1**

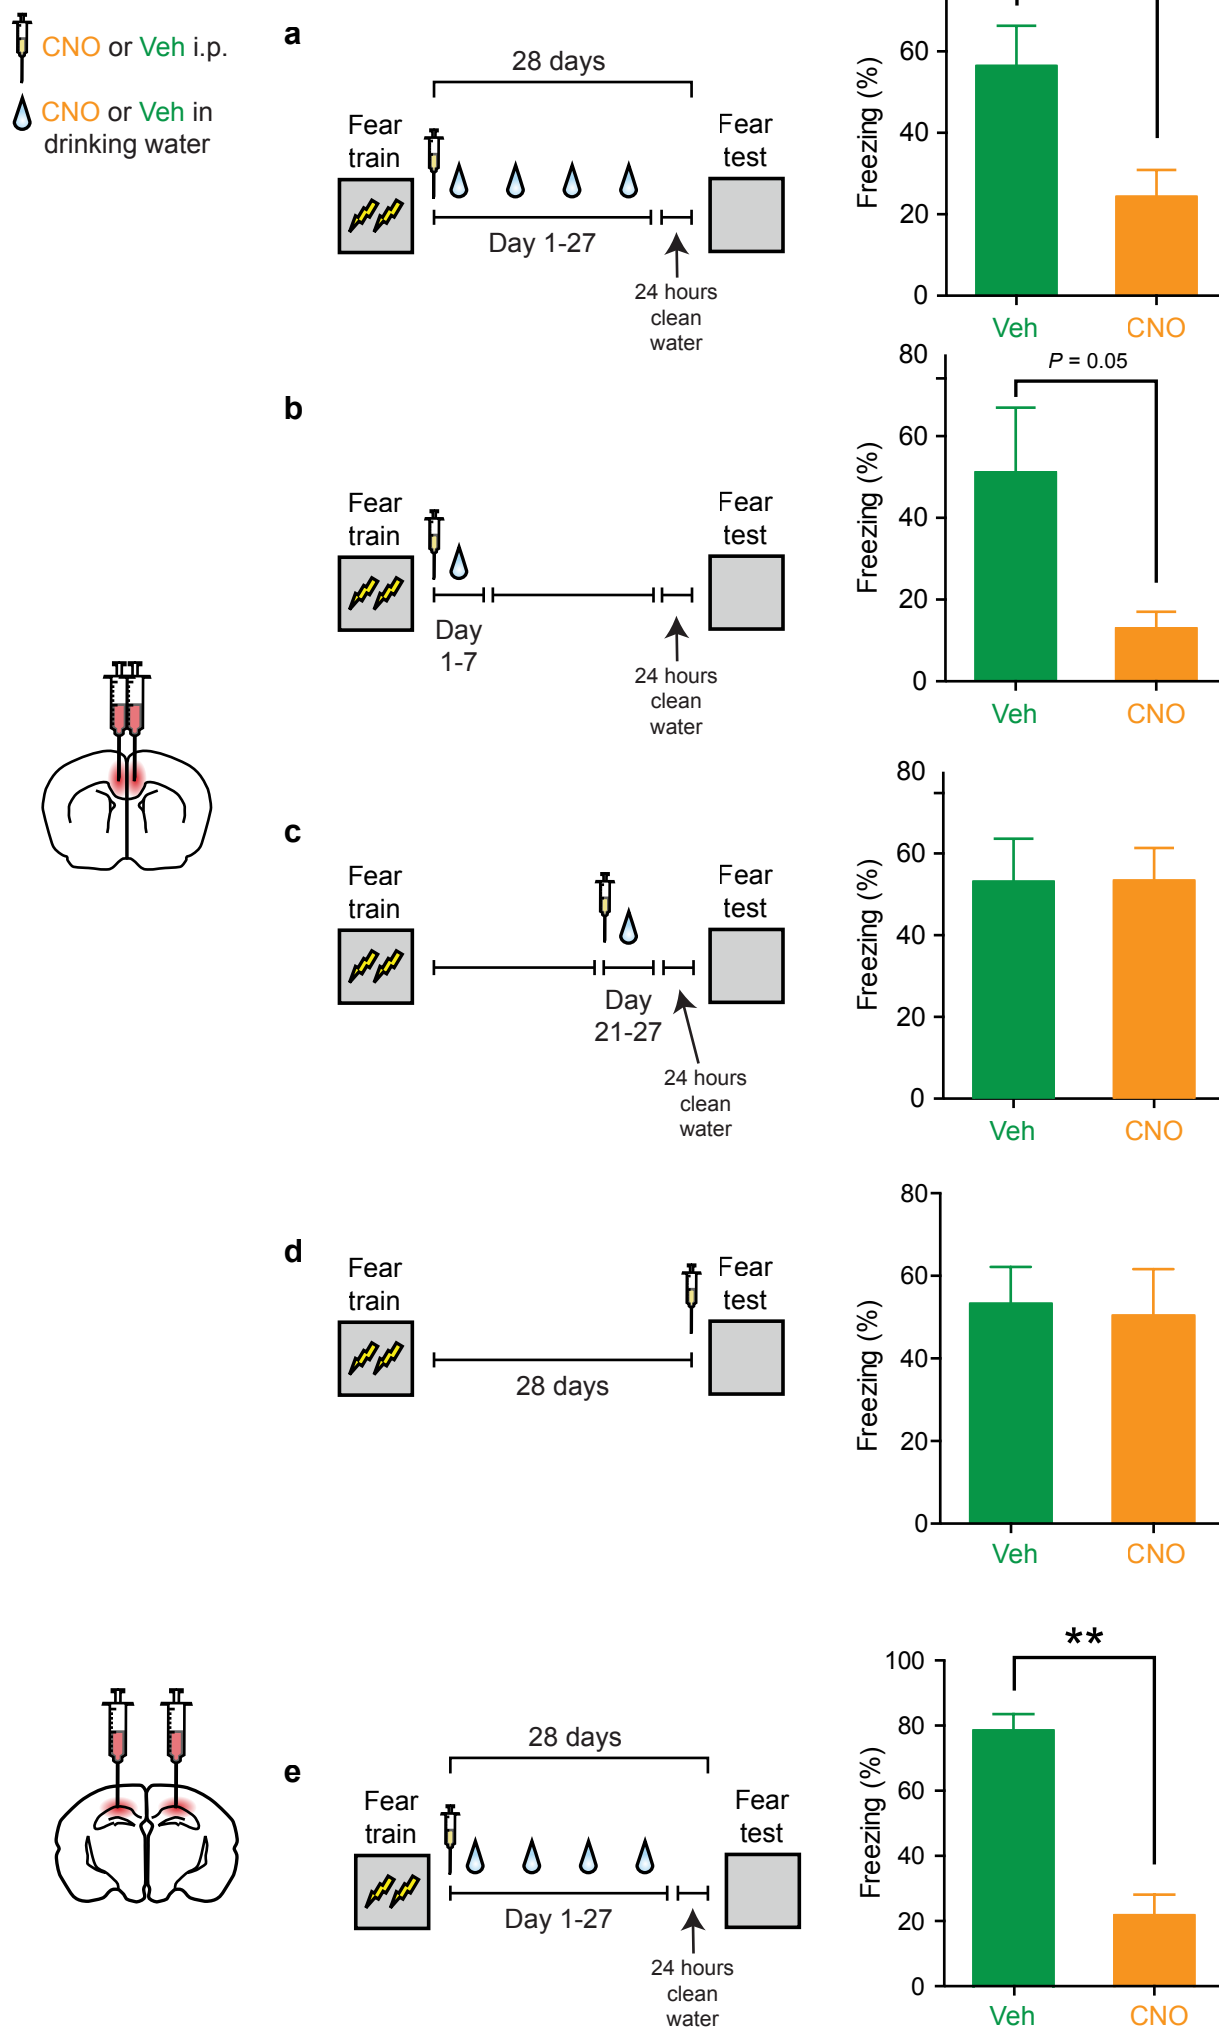

Supplement: supp [file elife-27868-supp-v1.zip › elife_poa_e27868_Figure_5_figure_supplement_1.pdf]

**Figure 2 - figure supplement 1**

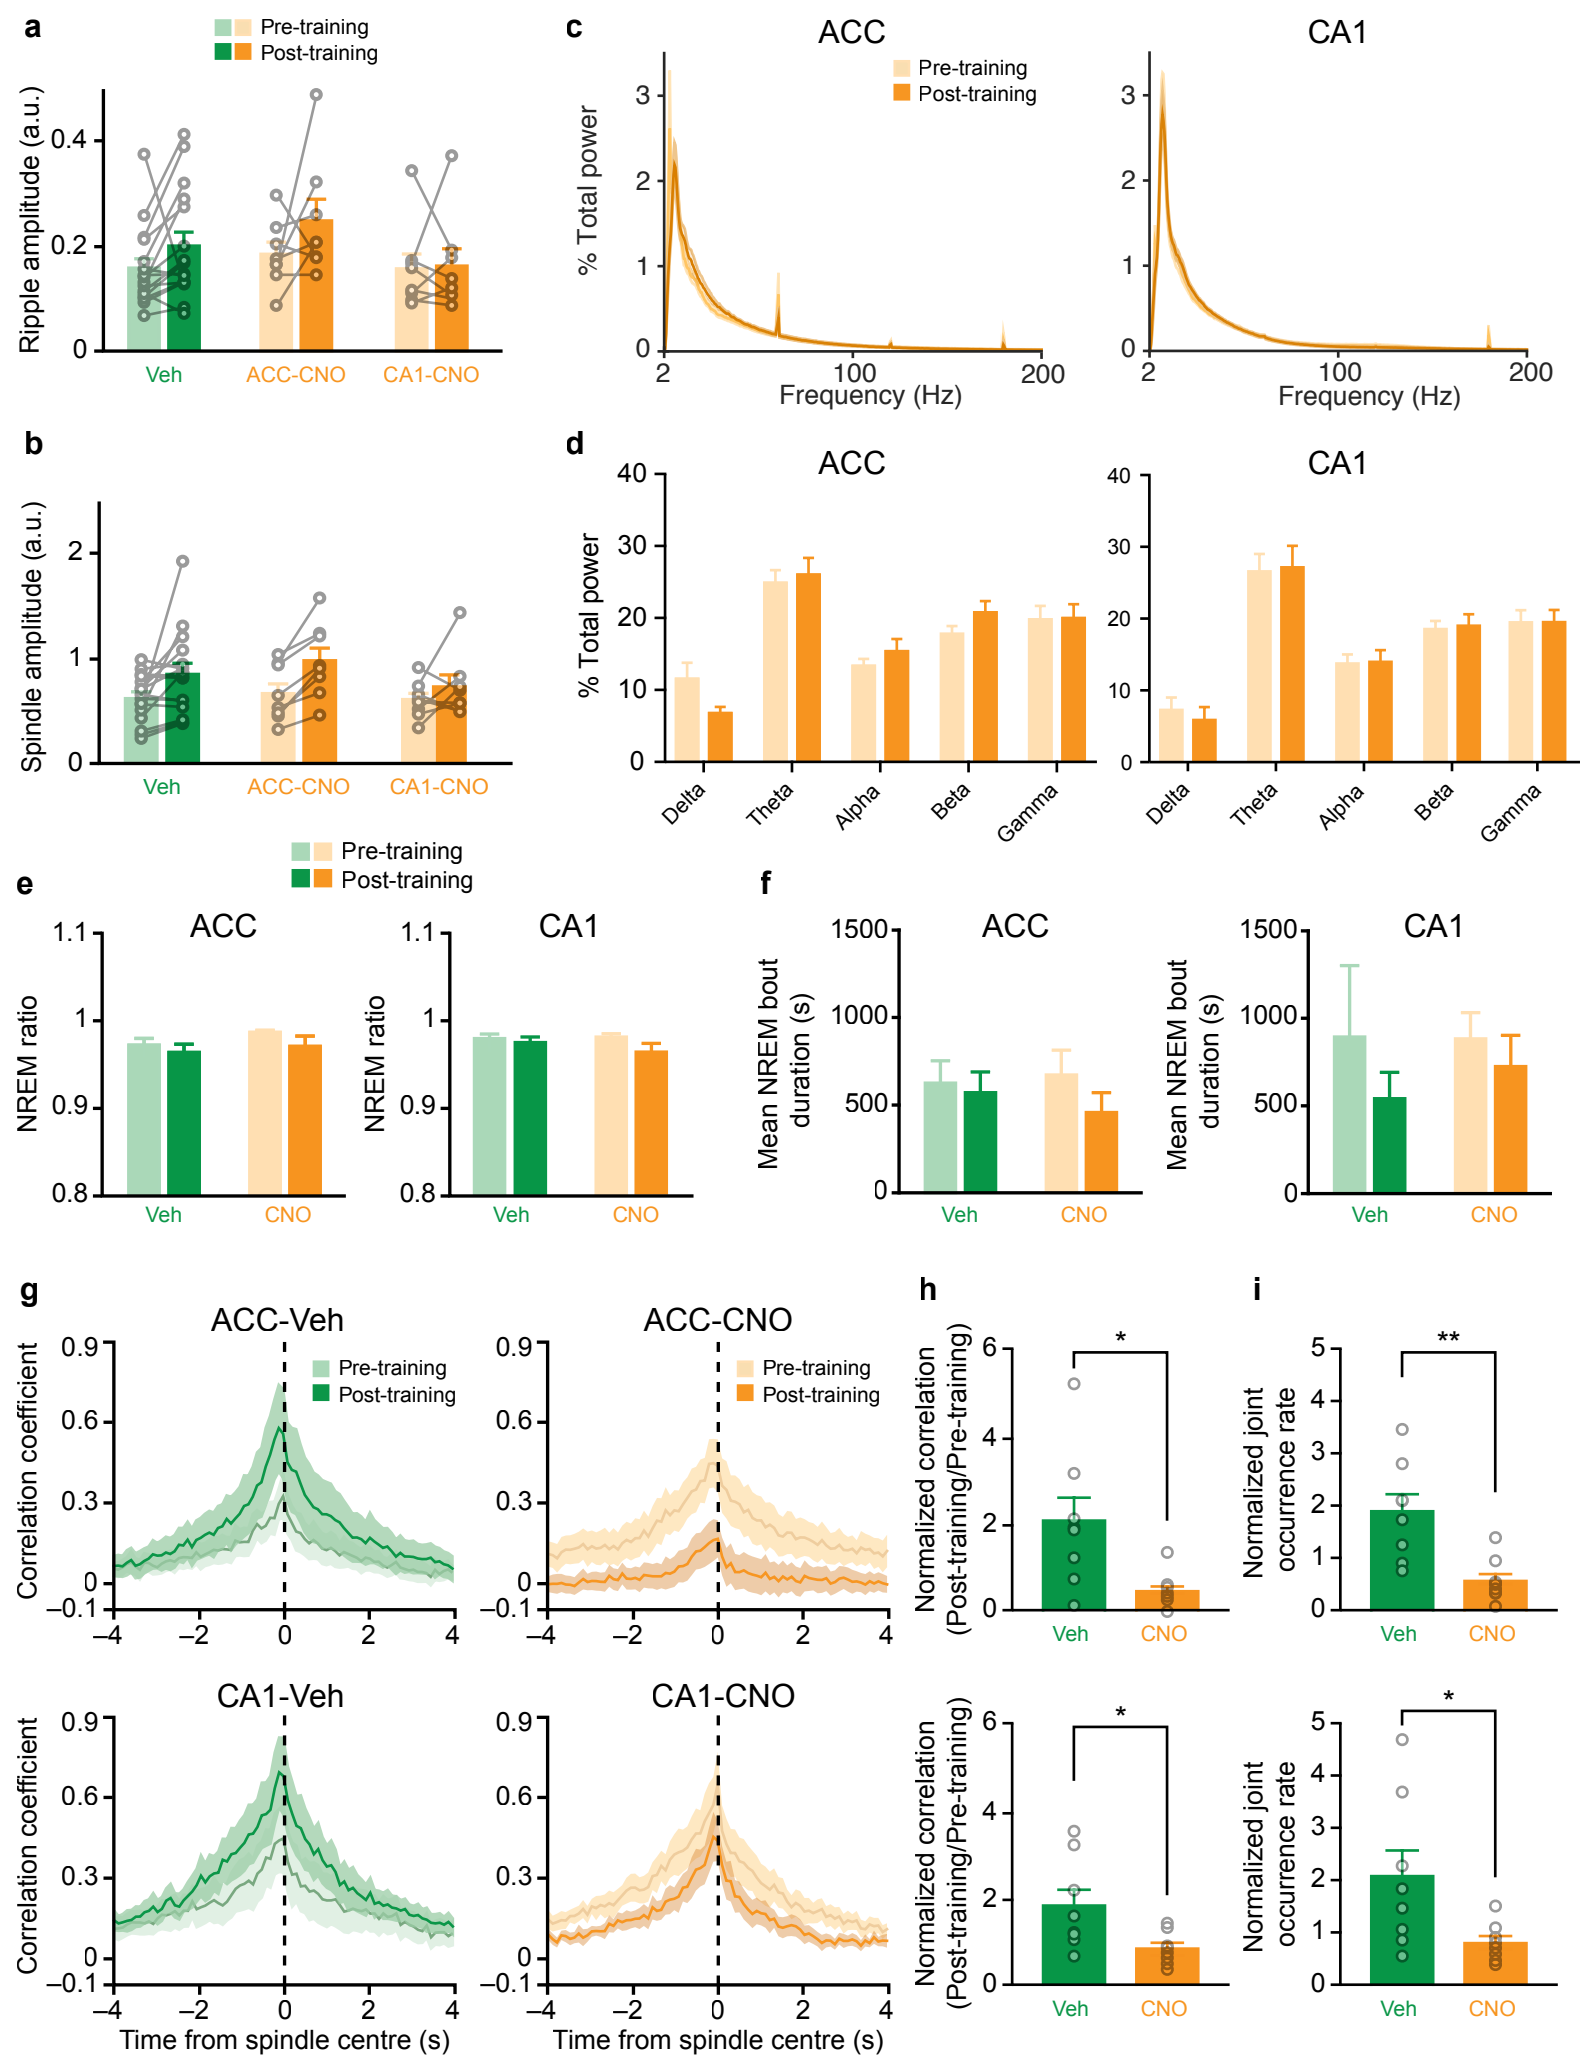

Supplement: supp [file elife-27868-supp-v1.zip › elife_poa_e27868_Figure_2_figure_supplement_1.pdf]
